# Supplementary material for: CSI NGS Portal: An Online Platform for Automated NGS Data Analysis and Sharing
Source: Preprints.org preprint supplement (doi:10.20944/preprints201910.0146.v1), 2019-10-13
Supplement: Supplementary file 3 [file supplementary]

**Supplementary Table S1: List of tools & packages and their usage in CSI NGS Portal**

All the tools and packages are regularly updated to the latest stable versions (unless version number is explicitly specified).

|                                | Bioinformatics Pipeline                     | Usage                                                      | Link                                                                                                                                                                            |
|--------------------------------|---------------------------------------------|------------------------------------------------------------|---------------------------------------------------------------------------------------------------------------------------------------------------------------------------------|
| <b>Website Development</b>     |                                             |                                                            |                                                                                                                                                                                 |
| Apache2                        | NA                                          | Web server                                                 | <a href="https://httpd.apache.org/">https://httpd.apache.org/</a>                                                                                                               |
| PHP                            | NA                                          | Website interface and functionality                        | <a href="https://www.php.net/">https://www.php.net/</a>                                                                                                                         |
| HTML5                          | NA                                          | Website interface and functionality                        | <a href="https://www.w3.org/TR/html5/">https://www.w3.org/TR/html5/</a>                                                                                                         |
| CSS                            | NA                                          | Website styling                                            | <a href="https://www.w3.org/Style/CSS/">https://www.w3.org/Style/CSS/</a>                                                                                                       |
| Bootstrap v3.3.6               | NA                                          | Interactive tables and responsive design                   | <a href="https://getbootstrap.com/">https://getbootstrap.com/</a>                                                                                                               |
| JavaScript                     | NA                                          | Dynamic features                                           | <a href="https://developer.mozilla.org/en-US/docs/Web/JavaScript">https://developer.mozilla.org/en-US/docs/Web/JavaScript</a>                                                   |
| jQuery v1.12.1                 | NA                                          | Dynamic features                                           | <a href="https://jquery.com/">https://jquery.com/</a>                                                                                                                           |
| jQuery File Upload             | NA                                          | Data upload interface                                      | <a href="https://github.com/blueimp/jQuery-File-Upload">https://github.com/blueimp/jQuery-File-Upload</a>                                                                       |
| <b>Database</b>                |                                             |                                                            |                                                                                                                                                                                 |
| MariaDB                        | NA                                          | Data storage                                               | <a href="https://mariadb.org/">https://mariadb.org/</a>                                                                                                                         |
| <b>Programming Languages</b>   |                                             |                                                            |                                                                                                                                                                                 |
| Bash                           | All                                         | Wrapper scripts for pipeline development                   | <a href="https://www.gnu.org/software/bash/">https://www.gnu.org/software/bash/</a>                                                                                             |
| Python                         | All                                         | Running of packages in conda environment                   | <a href="https://www.python.org/">https://www.python.org/</a> , <a href="https://anaconda.com">https://anaconda.com</a>                                                         |
| Perl                           | All                                         | Running of in-house and external pipelines                 | <a href="https://www.perl.org/">https://www.perl.org/</a>                                                                                                                       |
| R                              | 4C-Seq, Diff-Exp, Pathway-Enrichment        | Running CRAN and Bioconductor packages                     | <a href="https://www.r-project.org/">https://www.r-project.org/</a>                                                                                                             |
| <b>Anaconda2 Packages</b>      |                                             |                                                            |                                                                                                                                                                                 |
| FastQC                         | All                                         | Quality control                                            | <a href="https://www.bioinformatics.babraham.ac.uk/projects/fastqc/">https://www.bioinformatics.babraham.ac.uk/projects/fastqc/</a>                                             |
| Trimmomatic                    | All                                         | Adapter removal and read trimming                          | <a href="http://www.usadellab.org/cms/?page=trimmomatic">http://www.usadellab.org/cms/?page=trimmomatic</a>                                                                     |
| bedtools                       | All                                         | Genome arithmetic                                          | <a href="https://bedtools.readthedocs.io">https://bedtools.readthedocs.io</a>                                                                                                   |
| Samtools                       | All                                         | Manipulation of HTS files                                  | <a href="https://github.com/samtools/samtools">https://github.com/samtools/samtools</a>                                                                                         |
| Picard                         | DNA-Seq, RIP-Seq                            | Manipulation of HTS files                                  | <a href="https://github.com/broadinstitute/picard">https://github.com/broadinstitute/picard</a>                                                                                 |
| BWA (mem)                      | DNA-Seq, RNA-Editing, 4C-Seq                | Read mapping                                               | <a href="https://github.com/lh3/bwa">https://github.com/lh3/bwa</a>                                                                                                             |
| Bowtie2                        | SHAPE-Seq, Bisulfite-Seq                    | Read mapping                                               | <a href="http://bowtie-bio.sourceforge.net/bowtie2/index.shtml">http://bowtie-bio.sourceforge.net/bowtie2/index.shtml</a>                                                       |
| NovoAlign                      | smallRNA                                    | Read mapping                                               | <a href="http://www.novocraft.com/products/novalign/">http://www.novocraft.com/products/novalign/</a>                                                                           |
| STAR                           | RNA-Seq, RIP-Seq, rMATs, circRNA, eCLIP-Seq | RNA-Seq read alignment                                     | <a href="https://github.com/alexdobin/STAR">https://github.com/alexdobin/STAR</a>                                                                                               |
| GATK4 (Mutect2)                | DNA-Seq                                     | Genome analysis toolkit (Mutation calling)                 | <a href="https://software.broadinstitute.org/gatk/documentation/article?id=11136">https://software.broadinstitute.org/gatk/documentation/article?id=11136</a>                   |
| HTSeq (count)                  | RNA-Seq                                     | Gene expression quantification                             | <a href="https://htseq.readthedocs.io/en/master/count.html">https://htseq.readthedocs.io/en/master/count.html</a>                                                               |
| Salmon                         | RNA-Seq                                     | Isoform expression quantification                          | <a href="https://salmon.readthedocs.io/en/latest/salmon.html">https://salmon.readthedocs.io/en/latest/salmon.html</a>                                                           |
| MACS2                          | ChIP-Seq, RIP-Seq                           | Identification of transcription factor binding sites       | <a href="https://github.com/taoliu/MACS">https://github.com/taoliu/MACS</a>                                                                                                     |
| Homer                          | ChIP-Seq                                    | Motif enrichment analysis                                  | <a href="http://homer.ucsd.edu/homer/motif/">http://homer.ucsd.edu/homer/motif/</a>                                                                                             |
| ViennaRNA (RNAfold)            | SHAPE-Seq                                   | RNA secondary structure prediction                         | <a href="https://www.tbi.univie.ac.at/RNA/RNAfold.1.html">https://www.tbi.univie.ac.at/RNA/RNAfold.1.html</a>                                                                   |
| TrimGalore/Cutadapt            | RIP-Seq, Bisulfite-Seq                      | Adapter removal and read trimming                          | <a href="https://github.com/FelixKrueger/TrimGalore">https://github.com/FelixKrueger/TrimGalore</a>                                                                             |
| Bismark                        | Bisulfite-Seq                               | Methylation calling of bisulfite treated sequencing reads  | <a href="https://www.bioinformatics.babraham.ac.uk/projects/bismark/">https://www.bioinformatics.babraham.ac.uk/projects/bismark/</a>                                           |
| Singularity                    | eCLIP-Seq                                   | Running eCLIP container                                    | <a href="https://www.sylabs.io/guides/2.6/user-guide/">https://www.sylabs.io/guides/2.6/user-guide/</a>                                                                         |
| <b>R CRAN Packages</b>         |                                             |                                                            |                                                                                                                                                                                 |
| R ggplot2                      | Diff-Exp, Pathway-Enrichment                | Generation of plots and data visualisation                 | <a href="https://cran.r-project.org/web/packages/ggplot2/index.html">https://cran.r-project.org/web/packages/ggplot2/index.html</a>                                             |
| R magrittr                     | Diff-Exp, Pathway-Enrichment                | Data manipulation                                          | <a href="https://cran.r-project.org/web/packages/magrittr/index.html">https://cran.r-project.org/web/packages/magrittr/index.html</a>                                           |
| R dplyr                        | 4C-Seq, Diff-Exp, Pathway-Enrichment        | Data manipulation                                          | <a href="https://cran.r-project.org/web/packages/dplyr/index.html">https://cran.r-project.org/web/packages/dplyr/index.html</a>                                                 |
| R tidyR                        | Diff-Exp, Pathway-Enrichment                | Data manipulation                                          | <a href="https://cran.r-project.org/web/packages/tidyr/index.html">https://cran.r-project.org/web/packages/tidyr/index.html</a>                                                 |
| R tibble                       | Diff-Exp, Pathway-Enrichment                | Data manipulation                                          | <a href="https://cran.r-project.org/web/packages/tibble/index.html">https://cran.r-project.org/web/packages/tibble/index.html</a>                                               |
| R RMySQL                       | Diff-Exp                                    | Database connection                                        | <a href="https://cran.r-project.org/web/packages/RMySQL/index.html">https://cran.r-project.org/web/packages/RMySQL/index.html</a>                                               |
| <b>R Bioconductor Packages</b> |                                             |                                                            |                                                                                                                                                                                 |
| R Bioconductor r3Cseq          | 4C-Seq                                      | Identification of 4C interactions                          | <a href="https://www.bioconductor.org/packages/release/bioc/html/r3Cseq.html">https://www.bioconductor.org/packages/release/bioc/html/r3Cseq.html</a>                           |
| R Bioconductor BSgenome        | 4C-Seq                                      | Reference genome annotations                               | <a href="https://bioconductor.org/packages/release/bioc/html/BSgenome.html">https://bioconductor.org/packages/release/bioc/html/BSgenome.html</a>                               |
| R Bioconductor org.Hs.eg.db    | Diff-Exp                                    | Reference genome annotations                               | <a href="https://bioconductor.org/packages/release/data/annotation/html/org.Hs.eg.db.html">https://bioconductor.org/packages/release/data/annotation/html/org.Hs.eg.db.html</a> |
| R Bioconductor DESeq2          | Diff-Exp                                    | Differential gene expression analysis                      | <a href="https://www.bioconductor.org/packages/release/bioc/html/DESeq2.html">https://www.bioconductor.org/packages/release/bioc/html/DESeq2.html</a>                           |
| R Bioconductor regionReport    | Diff-Exp                                    | Generation of interactive report for DESeq2 results        | <a href="https://www.bioconductor.org/packages/release/bioc/html/regionReport.html">https://www.bioconductor.org/packages/release/bioc/html/regionReport.html</a>               |
| R Bioconductor biomaRt         | Diff-Exp                                    | ID mapping and conversion                                  | <a href="https://www.bioconductor.org/packages/release/bioc/html/biomaRt.html">https://www.bioconductor.org/packages/release/bioc/html/biomaRt.html</a>                         |
| R Bioconductor ReactomePA      | Diff-Exp, Pathway-Enrichment                | Pathway enrichment analysis                                | <a href="https://www.bioconductor.org/packages/release/bioc/html/ReactomePA.html">https://www.bioconductor.org/packages/release/bioc/html/ReactomePA.html</a>                   |
| R Bioconductor enrichplot      | Diff-Exp, Pathway-Enrichment                | Visualisation of pathway enrichment results                | <a href="https://bioconductor.org/packages/release/bioc/html/enrichplot.html">https://bioconductor.org/packages/release/bioc/html/enrichplot.html</a>                           |
| R Bioconductor DOSE            | Diff-Exp, Pathway-Enrichment                | Visualisation of pathway enrichment results                | <a href="https://bioconductor.org/packages/release/bioc/html/DOSE.html">https://bioconductor.org/packages/release/bioc/html/DOSE.html</a>                                       |
| <b>Standalone Pipeline</b>     |                                             |                                                            |                                                                                                                                                                                 |
| ANNOVAR                        | DNA-Seq, RNA-Editing, eCLIP-Seq             | Annotation of variants and peaks                           | <a href="http://annovar.openbioinformatics.org">http://annovar.openbioinformatics.org</a>                                                                                       |
| icSHAPE                        | SHAPE-Seq                                   | SHAPE reactivity calculation                               | <a href="https://github.com/qczhang/icSHAPE">https://github.com/qczhang/icSHAPE</a>                                                                                             |
| rMATs                          | rMATs                                       | Identification of differential alternative splicing events | <a href="http://rnaseq-mats.sourceforge.net/">http://rnaseq-mats.sourceforge.net/</a>                                                                                           |
| eCLIP                          | eCLIP-Seq                                   | Identification of genomic locations of RNA-bound proteins  | <a href="https://github.com/Yeolab/eclip">https://github.com/Yeolab/eclip</a>                                                                                                   |
